# Supplementary material
Source: publisher site journal article supplement (https://www.dovepress.com/get_supplementary_file.php?f=247443.docx)
Supplement: Supplementary file 1 [file get_supplementary_file.php]

**Supplementary materials**


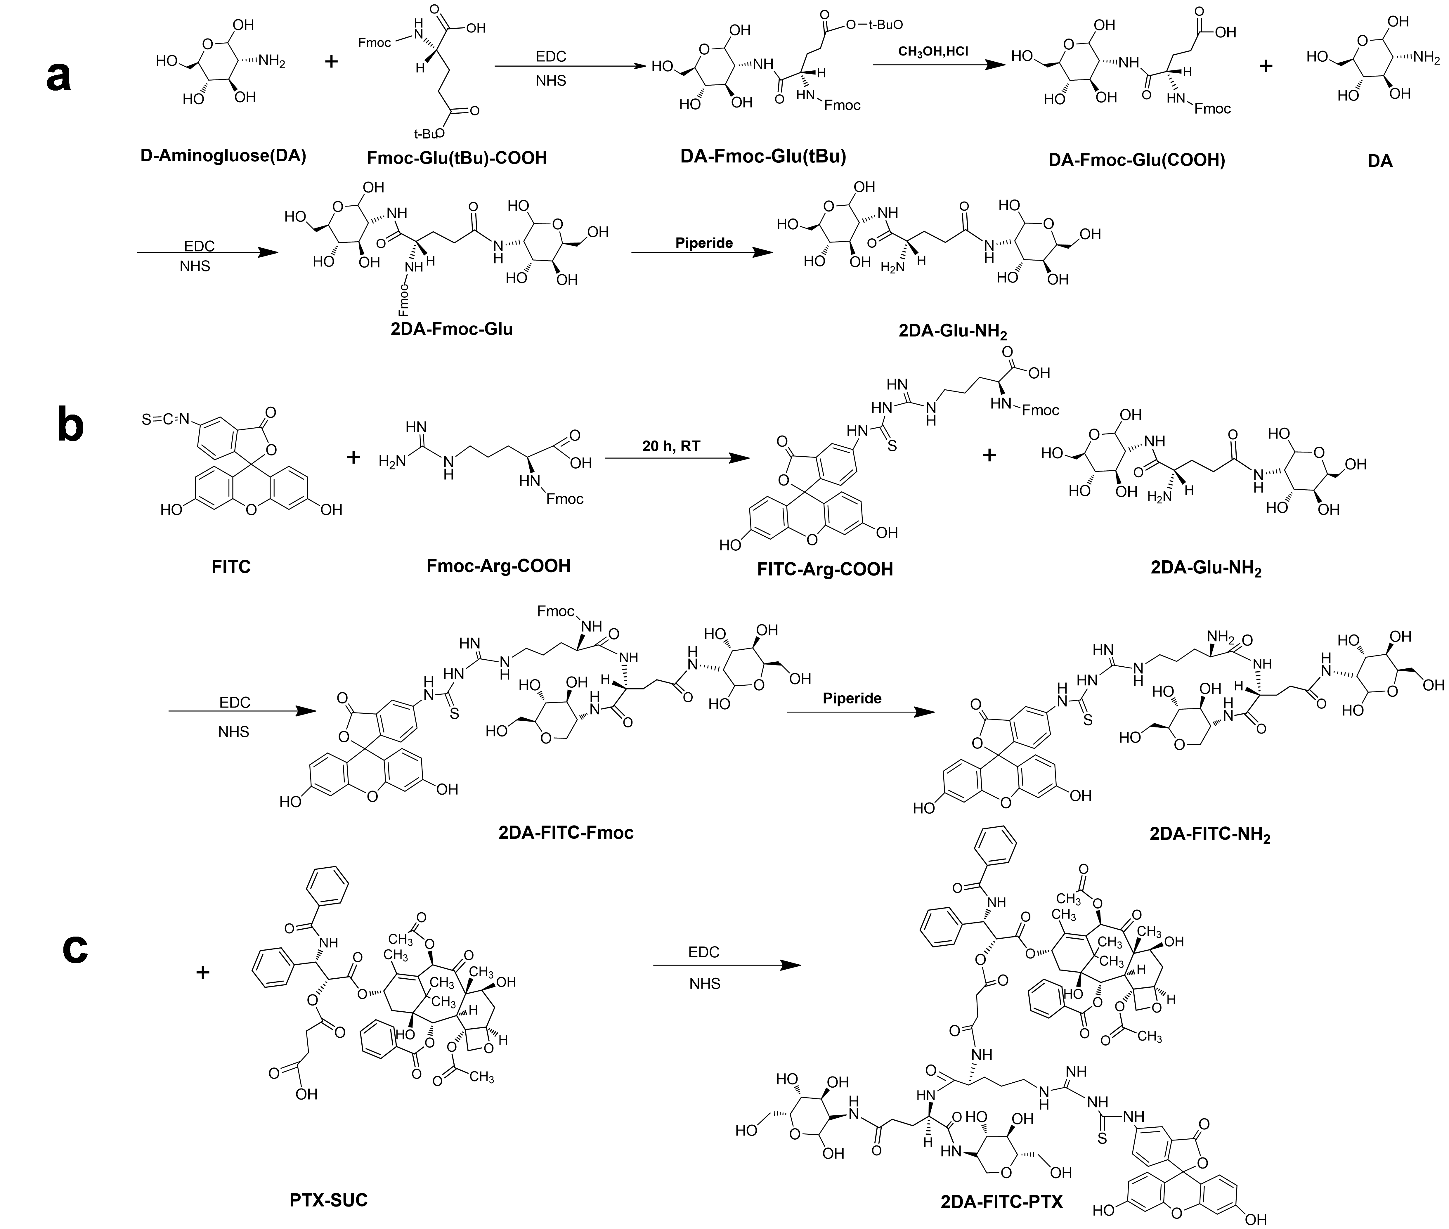


Figure S1. Synthetic route of 2DA-FITC-PTX.


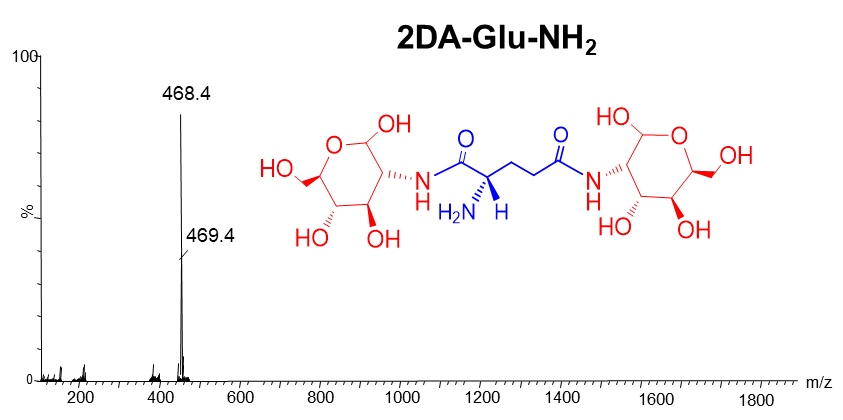


Figure S2: 2DA-Glu-NH2 LC-MS：[M + H]+]= 468.4 calc:469.4.


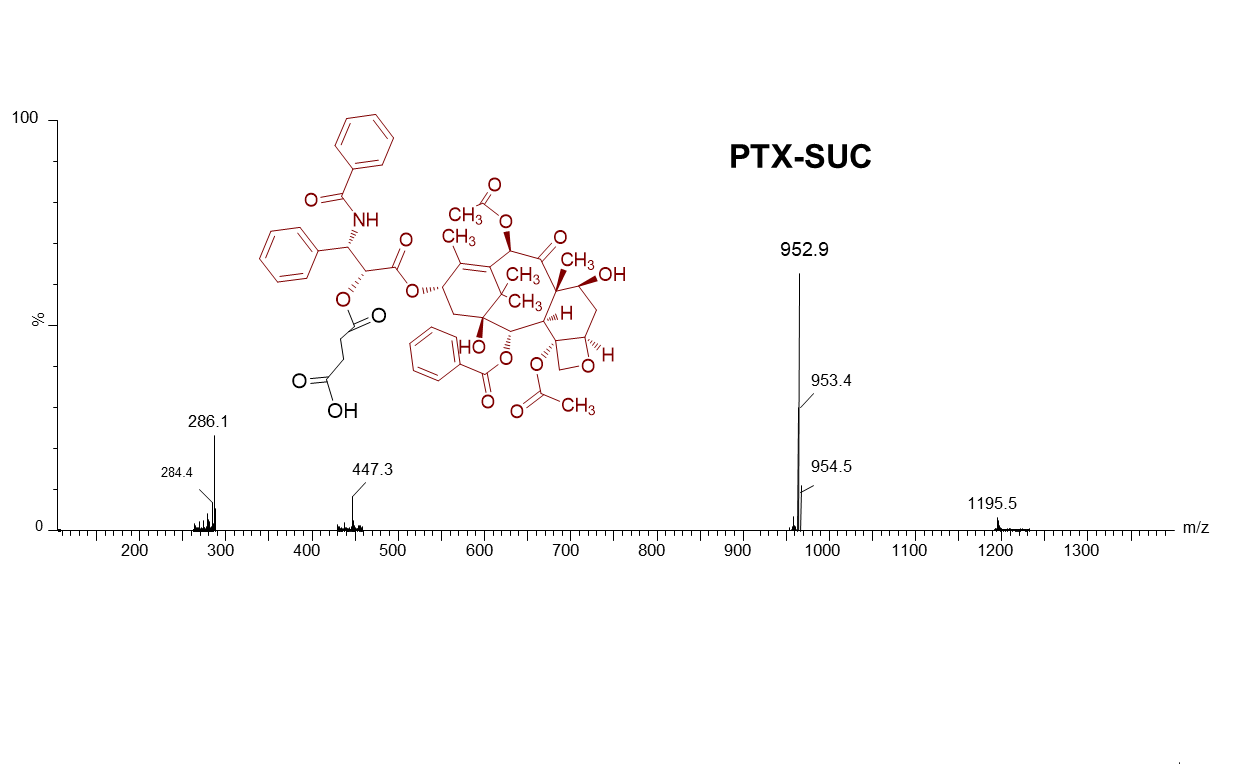


Figure S3: PTX-SUC LC-MS：[M + H] + =952.9 calc: 953.9


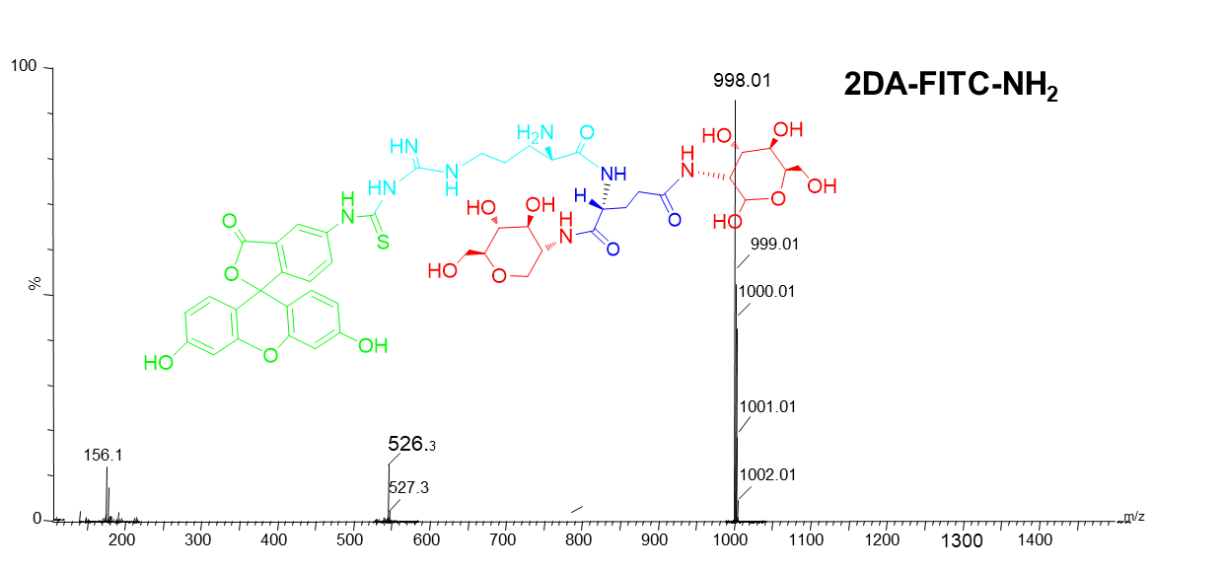


Figure S4: 2DA-FITC-NH2 LC-MS：[M + H] + = 998.9 calc: 999.9


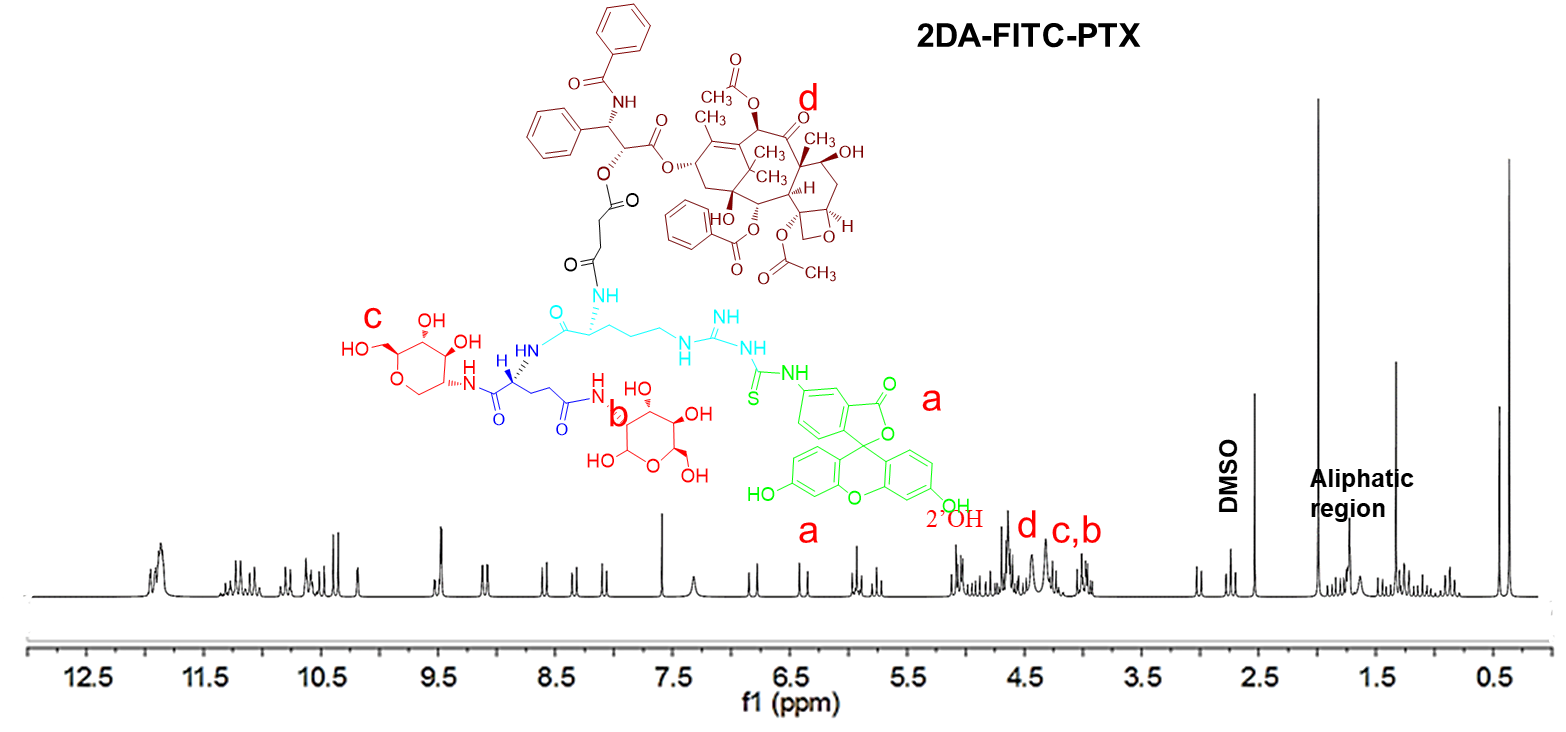


Figure S5: 1H NMR spectrum of 2DA-FITC-PTX. 1H NMR (400MHz, DMSO)





Figure S6: Zeta potential (mV) measurement of 2DA-FITC-PTX NPs


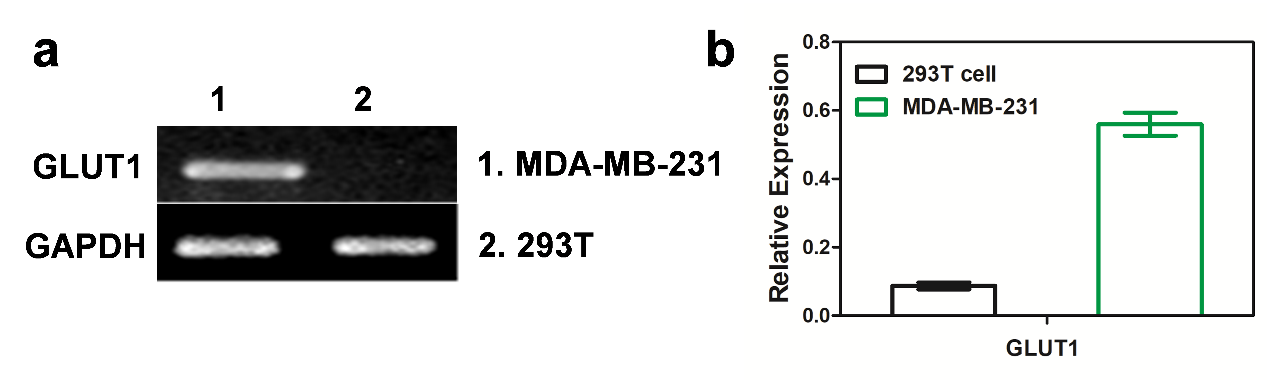


Figure S7.mRNA levels of GLUT1 expression on the MDA-MB-231 and 293T cells were determined by reverse transcriptase PCR.


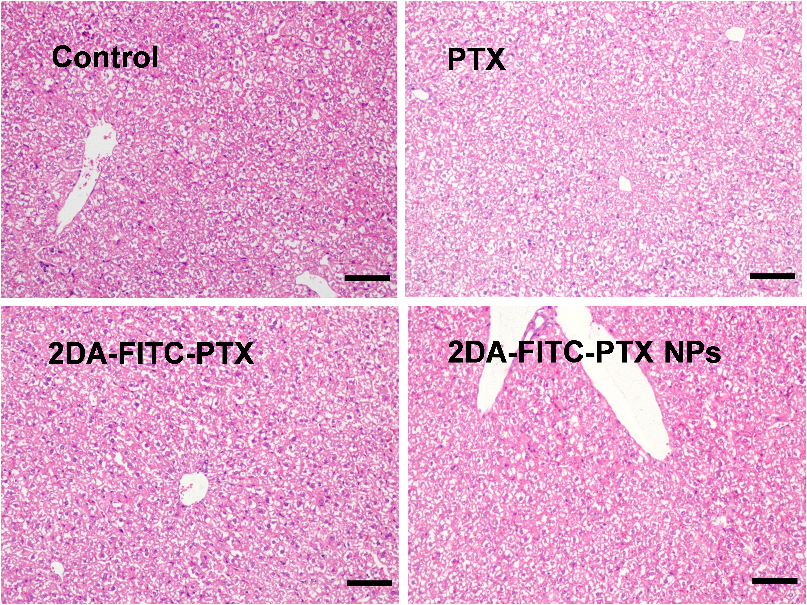


Figure S8. H&E stained images of heart after various administrations. Scale bars are 50 μm.


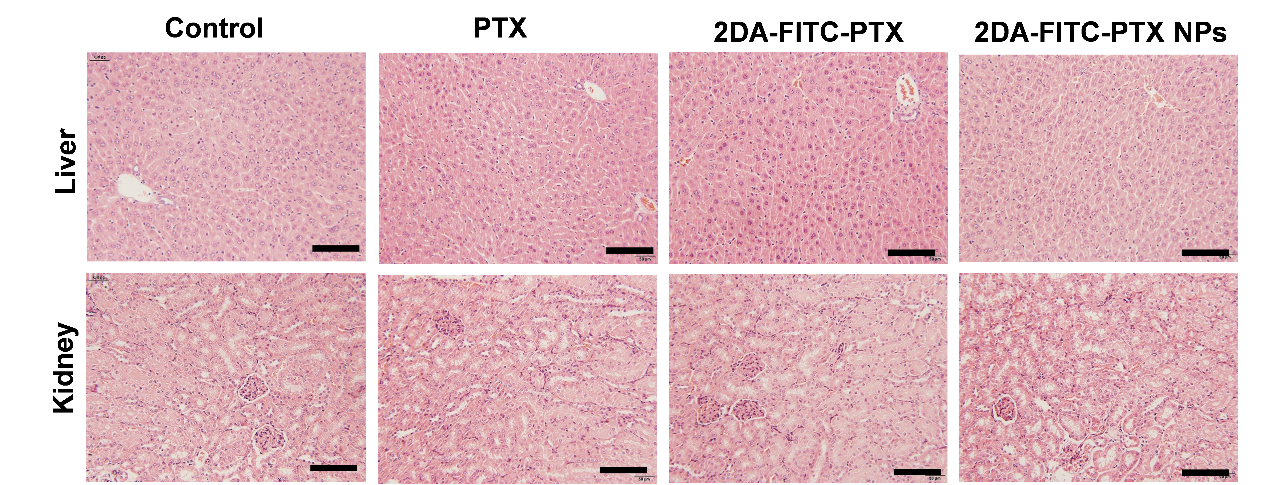


Figure S9. H&E-stained liver and kidney tissues after treated by PBS (control), PTX,

2DA-FITC-PTX and 2DA-FITC-PTX NPs, respectively. Scale bar, 50 μm.

Table S1: The drug loading efficiency, drug loading capacity and stability of 2DA-FITC-PTX NPs.

| Sample name | 2DA-FITC-PTX NPs conc.(ug/mL) | Calc. PTX  conc. (ug/mL) | Actual PTX  conc. (µg/Ml) | Drug loading efficiency | Drug loading capacity | Diameter (nm) | Stability |
| --- | --- | --- | --- | --- | --- | --- | --- |
| 2DA-FITC-PTX NPs-20% | 500 | 100 | 95 | 95% | 15.9% | 43 ± 9 | No visible precipitation in 2, 4, 8 weeks at 4 ºC or RT |
| 2DA-FITC-PTX NPs-50% | 200 | 100 | 96 | 96% | 32.4% | 42 ± 10 | No visible precipitation in 2, 4, 8 weeks at 4 ºC or RT |
| 2DA-FITC-PTX NPs-80% | 125 | 100 | 96 | 96% | 43.4% | 39 ± 8 | No visible precipitation in 2, 4, 8 weeks at 4 ºC or RT |
| 2DA-FITC-  PTX NPs-  100% | 100 | 100 | 97 | 97% | 49.2% | 40 ± 13 | No visible precipitation in 2, 4, 8 weeks at 4 ºC or RT |
| 2DA-FITC-PTX NPs-  200% | 50 | 100 | 98 | 98% | 66.2% | 41 ± 6 | No visible precipitation in 2, 4, 8 weeks at 4 ºC or RT |

2DA (2-glucosamine), FITC (Fluorescein-5(6)-isothiocyanate, green), PTX (Paclitaxel), 2DA-FITC-PTX NPs (2-glucosamine-fluorescein-5(6)-isothiocyanate-glutamicacid-paclitaxel nanoparticles), and RT (Room temperature).

Entrapment efficiency calculated as follows:

%EE = [(Drug added - Free "unentrapped drug")/Drug added] *100

Loading capacity calculated using the following equation:

%LC = [Entrapped Drug/nanoparticles weight] * 100
